# Supplementary material for: Antigen receptor sequencing of paired bone marrow samples shows homogeneous distribution of acute lymphoblastic leukemia subclones
Source: PubMed Central journal article supplement — Haematologica. 2017 Aug 31;102(11):1869–77. doi: 10.3324/haematol.2017.171454 (PMC5664391; doi:10.3324/haematol.2017.171454), 2017-11
Supplement: 2017_171454-Disclosures_and_Contributions.pdf [file 2017_171454-Disclosures_and_Contributions.pdf]

Haematologica  
HAEMATOL/2017/171454  
Version 3

Antigen receptor sequencing of paired bone marrow samples shows homogeneous distribution of acute lymphoblastic leukemia subclones

Prisca M.J. Theunissen, David van Zessen, Andrew P. Stubbs, Malek Faham, Michel Zwaan, Jacques J.M. van Dongen, and Vincent H.J. Van der Velden

Disclosures: VHJvdV: contract research for Amgen, Roche, Pfizer, Janssen, and BD Biosciences; consultancy fees from Celgene (none of these related to the content of this manuscript). JJMvD: contract research for Roche, Amgen, and BD Biosciences (none of these related to the content of this manuscript). The other authors declare no conflict of interest. MF was employee of Adaptive Biotechnologies, formerly Sequentia Inc.

Contributions: Contributions: Conception and design: PMJT, JJMvD, VHJvdV. Provision of study materials or patients: CMZ. Collection and assembly of data: PMJT, MF. Data analysis and interpretation: PMJT, DvZ, APS, JJMvD, VHJvdV. Manuscript writing: PMJT and VHJvdV. Final approval of manuscript: All authors.
